# Supplementary material
Source: MDPI journal article supplement (https://www.mdpi.com/2073-4395/11/11/2118)
Supplement: s1 [file s1 › agronomy-1395603-supplementary.pdf]

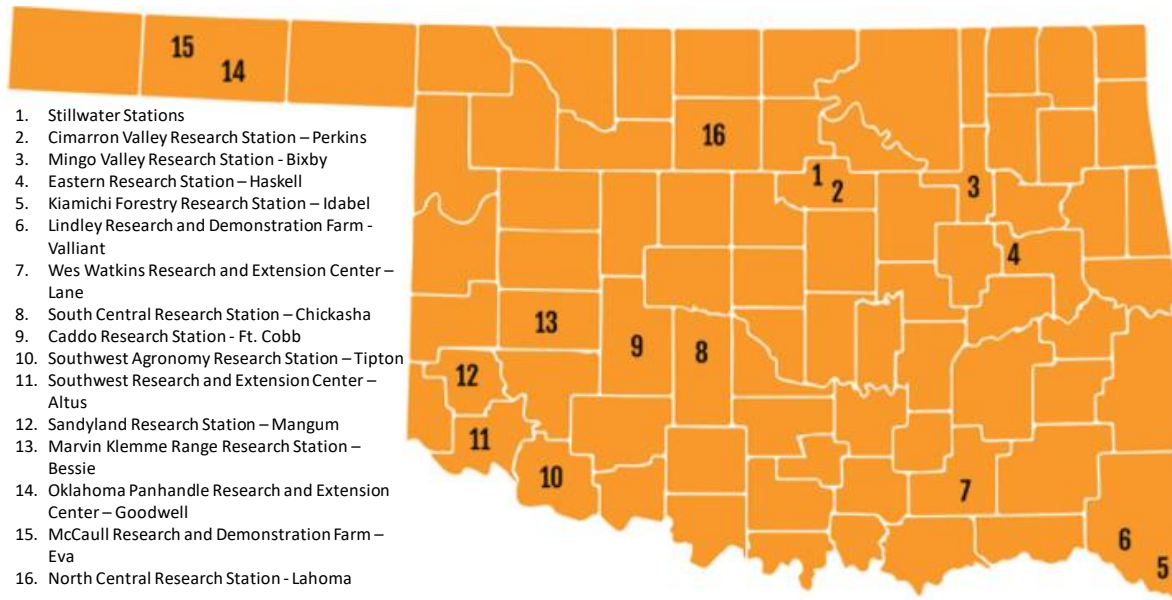

**Figure S1.** The locations of field research stations of Oklahoma State University where plant samples were collected.

**Table S1.** Summary of elemental K-edge absorption energies that were scanned under 50 keV pXRF analysis settings, and the pXRF limit of detection (LOD) and maximum limit for the ‘Soil Nutrient and Metal’ calibration provided by the manufacturer.

| Element | K-edge<br>(keV) | -----pXRF (mg kg <sup>-1</sup> )----- |                               |
|---------|-----------------|---------------------------------------|-------------------------------|
|         |                 | LOD                                   | Maximum<br>limit <sup>a</sup> |
| P       | 2.14155         | 30                                    | 1900                          |
| K       | 3.6074          | 40                                    | 50000                         |
| Ca      | 4.0381          | 25                                    | 10000                         |
| Mg      | 1.305           | 600                                   | 252000                        |
| S       | 2.472           | 35                                    | 133000                        |
| Cu      | 8.979           | <5                                    | 30800                         |
| Fe      | 7.112           | 15                                    | 248000                        |
| Zn      | 9.6586          | <5                                    | 99000                         |
| Mn      | 6.659           | 15                                    | 2100                          |

<sup>a</sup> Maximum value of the calibration method used.

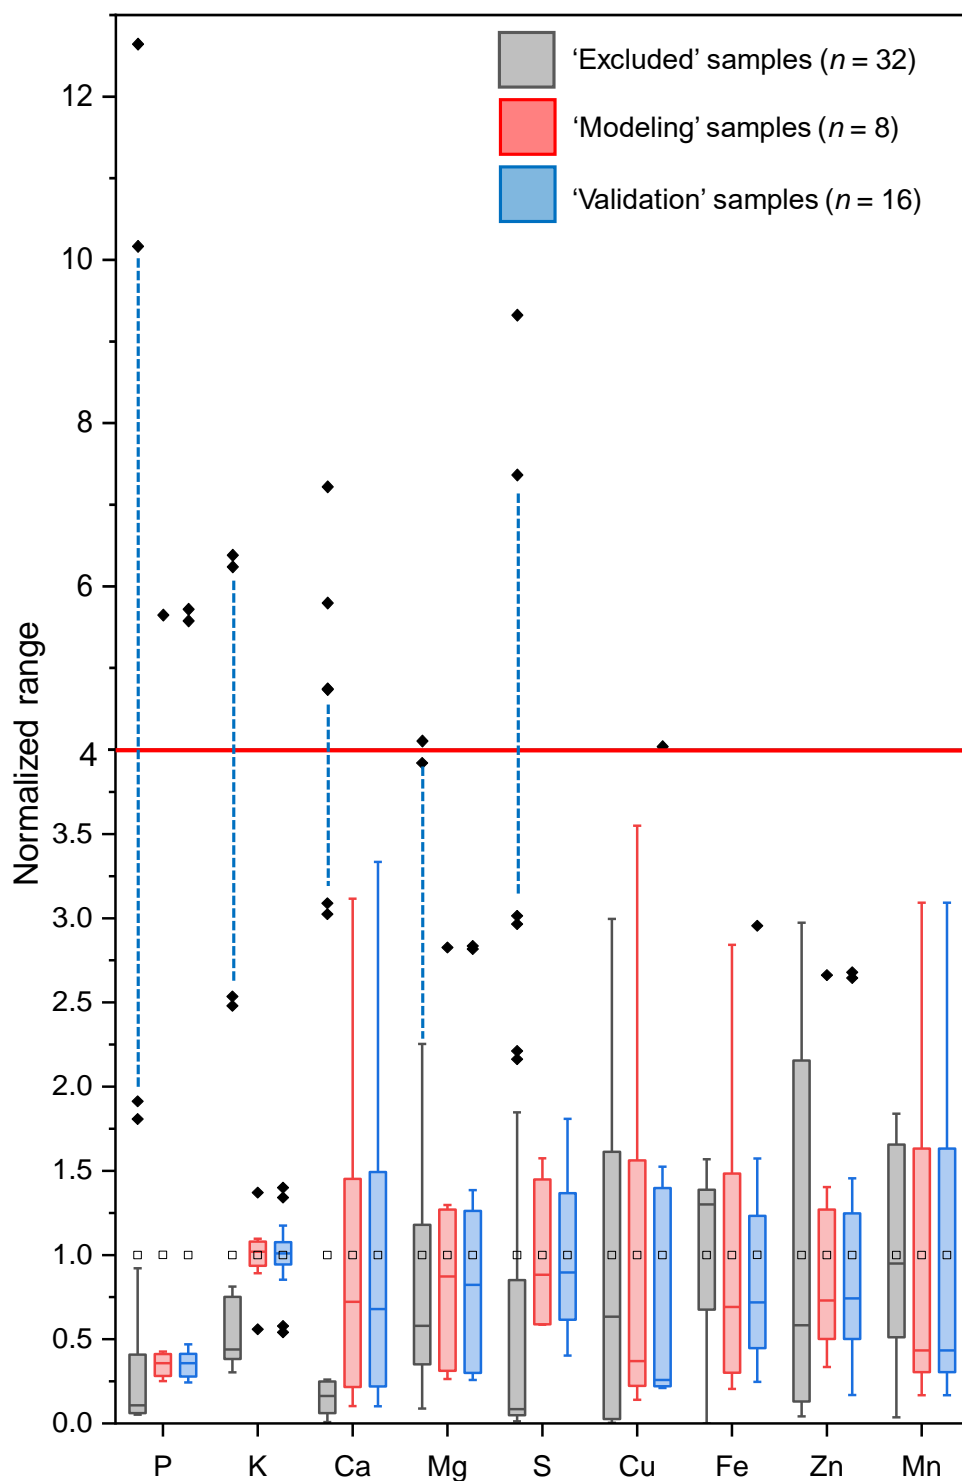

**Figure S2.** Box-plots of 'excluded', 'modeling', and 'validation' datasets. Single results were divided by the average to normalize data and plot variables in the same range. Boxes span the 25<sup>th</sup> to 75<sup>th</sup> data percentile, whiskers represent  $1.5 \times$  the interquartile range, horizontal lines denote the median, squared points denote the mean, and  $\blacklozenge$  denotes the outlier. The horizontal red line separates the dataset from extreme values. Vertical blue dashed lines highlight extreme values belonging to the 'excluded' dataset.
